# Supplementary material for: Enhancing Flower Color through Simultaneous Expression of the B-peru and mPAP1 Transcription Factors under Control of a Flower-Specific Promoter
Source: PubMed Central journal article supplement (PMC5796253; doi:10.3390/ijms19010309), 2018-01-20
Supplement: ijms-19-00309-s001.pdf [file ijms-19-00309-s001.pdf]

## Supplementary Materials:

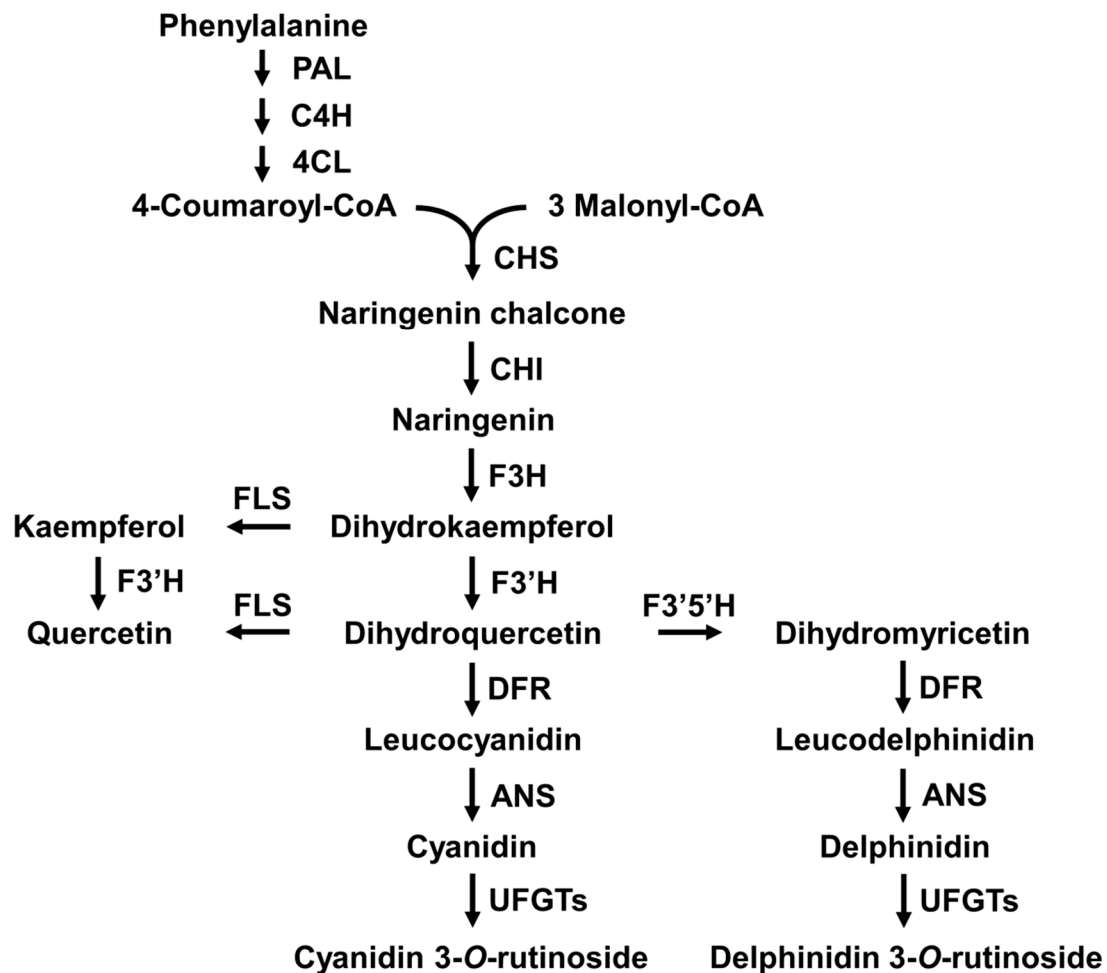

**Figure S1.** Schematic representation of anthocyanins biosynthetic pathway in tobacco. PAL, phenylalanine ammonia-lyase; C4H, cinnamate 4-hydroxylase; 4CL, 4-coumarate-CoA ligase; CHS, chalcone synthase; CHI, chalcone isomerase; F3H, flavanone 3-hydroxylase; FLS, flavonol synthase; F3'H, flavonoid 3'-hydroxylase; F3'5'H, flavonoid 3',5'-hydroxylase; DFR, dihydroflavonol 4-reductase; ANS, anthocyanidin synthase; UFGT, UDP-glucose: flavonoid 3-O-glucosyltransferase.

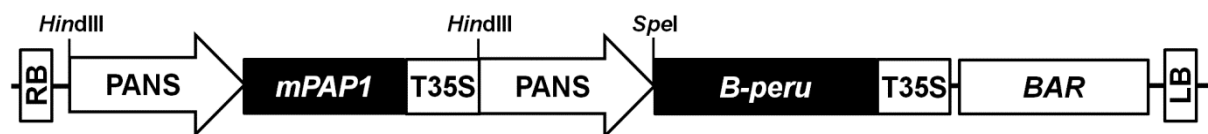

**Figure S2.** Schematic representation of the binary vector PANSBP used for *B-peru* and *mPAP1* expression in flowers.

**Table S1.** PCR primers used in this study.

| Primer                  | Sequence                                        | Usage        |
|-------------------------|-------------------------------------------------|--------------|
| PANS-F                  | 5'- CCGGTCAACTCAAGACAACCTACCTA-3'               | Gene cloning |
| PANS-R                  | 5'-TTTGTACAAACTTGCTCTGTATTATTCTT-3'             | Gene cloning |
| mPAP1-F                 | 5'-AAGAATAATACAGAGACAAGTTTGTA CAAA-3'           | Gene cloning |
| T35S-R                  | 5'-TCTAGAGGGCCCGACGTCGCATGCCTGC-3'              | Gene cloning |
| PANS- <i>Hind</i> III-F | 5'-AGCTCAAGCTAAGCTTCCGGTCAACTCAAGACAAC-3'       | Gene cloning |
| PANS- <i>Spe</i> I-R    | 5'-TTGTGATATCACTAGTCTCTGTATTATTCTTGCTTTTTCTT-3' | Gene cloning |
| T35S-R1                 | 5'-TGAGTTGACCGGAAGCTTCTAGAGGGCCCGACGTCGCAT-3'   | Gene cloning |
| NtF3'5'H-F              | 5'-TTGATGTGTGGGAAAAACCA-3'                      | qPCR         |
| NtF3'5'H-R              | 5'-CAAATCGTTCCTCTTGGA-3'                        | qPCR         |
| NtMYB3-F                | 5'-CCGGGAGAACTGATAATGA-3'                       | qPCR         |
| NtMYB3-R                | 5'-TTTCTGGCCAAAACCAAGG-3'                       | qPCR         |
| NtETC1-F                | 5'-TCCTCCTGATTCTCAAGGAAA-3'                     | qPCR         |
| NtETC1-R                | 5'-TCCGGGTATTCTCCAGCTA-3'                       | qPCR         |
